# Supplementary material for: Integrative taxonomy reveals three new species and one new record of Psychropotes (Holothuroidea, Elasipodida, Psychropotidae) from the Kermadec Trench region and the Wallaby-Zenith Fracture Zone
Source: PeerJ. 2025 Feb 21;13:e18806. doi: 10.7717/peerj.18806 (PMC11849507; doi:10.7717/peerj.18806)
Supplement: Supplemental Information 1 [file peerj-13-18806-s001.xlsx]

## Sheet: Supplementary Table S1
Supplementary Table S1: Primer sequences used for the amplification of 16S and COI in new species and one new record of Psychropotes; F is for the forward and R for the reverse primer.
Primer	Sequences (5'-3')	Sources
16S-arL	CGCCGTTTATCAAAAACAT	Palumbi et al., 1996
16S-brH	CCGGTCTGAACTCAGATCACG	Palumbi et al., 1996
COIce-F	ACTGCCCACGCCCTAGCAATGATATTTTTTATGGTNATGCC	Hoareau & Boissin, 2010
COIce-R	TCGTGTGTCTACGTCCATTCCTACTCTRAACATRTG	Hoareau & Boissin, 2010
References
Arndt A, Marquez C, Lambert P, Smith MJ. 1996. Molecular Phylogeny of Eastern Pacific Sea Cucumbers (Echinodermata: Holothuroidea) Based on Mitochondrial DNA Sequence. Molecular Phylogenetic and Evolution 6(3): 425–437 DOI 10.1006/mpev.1996.0091.
Hoareau TB, Boissin E. 2010. Design of phylum: pecific hybrid primers for dna barcoding: addressing the need for efficient coi amplification in the echinodermata. Molecular Ecology Resources 10(6): 960–967 DOI 10.1111/j.1755-0998.2010.02848.x.
